# Supplementary material for: Tessaria absinthioides (Hook. & Arn.) DC. (Asteraceae) Decoction Improves the Hypercholesterolemia and Alters the Expression of LXRs in Rat Liver and Hypothalamus
Source: MDPI journal article supplement (doi:10.3390/metabo11090579), 2021-08-27
Supplement: s1 [file s1]

*Tessaria absinthioides* (Hook. & Arn.) DC. (Asteraceae) Decoction Improves the Hypercholesterolemia and Alters the Expression of LXRs in Rat Liver and Hypothalamus

Mariana Rey, María S. Kruse, Rocío N. Magrini-Huamán, Jessica Gómez, Mario J. Simirgiotis, Alejandro Tapia, Gabriela E. Feresin and Héctor Coirini.

**Table S1:** Two-way ANOVA statistical data of each individual week for BW and BW gain using the factors diet (normal diet or high-fat diet) and beverage (W or Ta).

|                | Weeks                                             |                                                   |                                                   |
|----------------|---------------------------------------------------|---------------------------------------------------|---------------------------------------------------|
|                | 2                                                 | 4                                                 | 6                                                 |
| <b>BW</b>      | $F_{\text{Diet}(1,16)}=0.230$ ; $p=0.6384$        | $F_{\text{Diet}(1,16)}=1.180$ ; $p=0.2934$        | $F_{\text{Diet}(1,16)}=2.367$ ; $p=0.1435$        |
|                | $F_{\text{Beverage}(1,16)}=0.008$ ; $p=0.9285$    | $F_{\text{Beverage}(1,16)}=0.002$ ; $p=0.9667$    | $F_{\text{Beverage}(1,16)}=0.007$ ; $p=0.9353$    |
|                | $F_{\text{Interaction}(1,16)}=0.015$ ; $p=0.9056$ | $F_{\text{Interaction}(1,16)}=0.003$ ; $p=0.9549$ | $F_{\text{Interaction}(1,16)}=0.007$ ; $p=0.9353$ |
| <b>BW gain</b> | $F_{\text{Diet}(1,16)}=7.897$ ; $p=0.0126$ ,      | $F_{\text{Diet}(1,16)}=13.458$ ; $p=0.0021$       | $F_{\text{Diet}(1,16)}=18.724$ ; $p=0.0005$       |
|                | $F_{\text{Beverage}(1,16)}=1.662$ ; $p=0.2157$    | $F_{\text{Beverage}(1,16)}=0.303$ ; $p=0.5894$    | $F_{\text{Beverage}(1,16)}=0.546$ ; $p=0.4708$    |
|                | $F_{\text{Interaction}(1,16)}=2.285$ ; $p=0.1502$ | $F_{\text{Interaction}(1,16)}=0.848$ ; $p=0.3708$ | $F_{\text{Interaction}(1,16)}=0.685$ ; $p=0.4202$ |

**Table S2:** RM two-way ANOVA statistical data for food and beverage intake in a 21 day-period using the factors diet (normal diet or high-fat diet) and beverage (W or Ta).

|                       |                                                               |
|-----------------------|---------------------------------------------------------------|
| <b>Beverageintake</b> | $F_{\text{Days}}(2.97,47.44)=363.610; p<0.0001$               |
|                       | $F_{\text{Days-Diet}}(2.97,47.44)=153.654; p<0.0001$          |
|                       | $F_{\text{Days-Beverage}}(2.97,47.44)=102.687; p<0.0001$      |
|                       | $F_{\text{Days-Beverage-Diet}}(2.97,47.44)=119.647; p<0.0001$ |
| <b>Foodintake</b>     | $F_{\text{Days}}(1.27,20.21)=286.282; p<0.0001$               |
|                       | $F_{\text{Days-Diet}}(1.27,20.21)=275.496; p<0.0001$          |
|                       | $F_{\text{Days-Beverage}}(1.27,20.21)=90.844; p<0.0001$       |
|                       | $F_{\text{Days-Beverage-Diet}}(1.27,20.21)=67.722; p<0.0001$  |

**Table S3:** Two way ANOVA statistical data of each individual week for TC, HDL-c and TG using diet (normal diet or high-fat diet) and beverage (W or Ta) as factors.

|      |  | Weeks                                          |                                                 |                                                 |
|------|--|------------------------------------------------|-------------------------------------------------|-------------------------------------------------|
|      |  | 2                                              | 4                                               | 6                                               |
| TC   |  | $F_{\text{Diet}}(1,16)=145.370; p<0.0001$      | $F_{\text{Diet}}(1,16)=60.923; p<0.0001$        | $F_{\text{Diet}}(1,16)=9.938; p=0.0062$         |
|      |  | $F_{\text{Beverage}}(1,16)=0.043; p=0.8382$    | $F_{\text{Beverage}}(1,16)=31.695; p<0.0001$    | $F_{\text{Beverage}}(1,16)=16.259; p=0.0010$    |
|      |  | $F_{\text{Interaction}}(1,16)=0.118; p=0.7359$ | $F_{\text{Interaction}}(1,16)=19.605; p=0.0004$ | $F_{\text{Interaction}}(1,16)=12.558; p=0.0027$ |
| HDLc |  | $F_{\text{Diet}}(1,16)=62.085; p<0.0001$       | $F_{\text{Diet}}(1,16)=5.862; p=0.0277$         | $F_{\text{Diet}}(1,16)=13.977; p=0.0018$        |
|      |  | $F_{\text{Beverage}}(1,16)=0.008; p=0.9311$    | $F_{\text{Beverage}}(1,16)=20.708; p=0.0003$    | $F_{\text{Beverage}}(1,16)=1.717; p=0.2086$     |
|      |  | $F_{\text{Interaction}}(1,16)=0.269; p=0.6109$ | $F_{\text{Interaction}}(1,16)=6.172; p=0.0244$  | $F_{\text{Interaction}}(1,16)=5.860; p=0.0277$  |
| TG   |  | $F_{\text{Diet}}(1,16)=44.322; p<0.0001$       | $F_{\text{Diet}}(1,16)=53.235; p<0.0001$        | $F_{\text{Diet}}(1,16)=99.716; p<0.0001$        |
|      |  | $F_{\text{Beverage}}(1,16)=0.138; p=0.7150$    | $F_{\text{Beverage}}(1,16)=2.528; p=0.1314$     | $F_{\text{Beverage}}(1,16)=0.839; p=0.3734$     |
|      |  | $F_{\text{Interaction}}(1,16)=2.036; p=0.1728$ | $F_{\text{Interaction}}(1,16)=0.075; p=0.78883$ | $F_{\text{Interaction}}(1,16)=0.016; p=0.9007$  |

**Table S4:** Two-way ANOVA statistical data of each individual week for the expression of LXRs in liver and hypothalamus using the factors diet (normal diet or high-fat diet) and beverage (W or Ta).

|                               |  | Weeks                                          |                                                 |                                                 |
|-------------------------------|--|------------------------------------------------|-------------------------------------------------|-------------------------------------------------|
|                               |  | 2                                              | 4                                               | 6                                               |
| <b>LIVER</b>                  |  |                                                |                                                 |                                                 |
|                               |  | $F_{\text{Diet}}(1,16)=45.106; p<0.0001$       | $F_{\text{Diet}}(1,16)=45.037; p<0.0001$        | $F_{\text{Diet}}(1,16)=13.607; p=0.0020$        |
| <b>LXR<math>\alpha</math></b> |  | $F_{\text{Beverage}}(1,16)=0.907; p=0.3550$    | $F_{\text{Beverage}}(1,16)=7.845; p=0.0128$     | $F_{\text{Beverage}}(1,16)=6.506; p=0.0214$     |
|                               |  | $F_{\text{Interaction}}(1,16)=0.002; p=0.9590$ | $F_{\text{Interaction}}(1,16)=8.206; p=0.0112$  | $F_{\text{Interaction}}(1,16)=6.236; p=0.0238$  |
| <b>LXR<math>\beta</math></b>  |  | $F_{\text{Diet}}(1,16)=77.693; p<0.0001$       | $F_{\text{Diet}}(1,16)=55.812; p<0.0001$        | $F_{\text{Diet}}(1,16)=27.977; p<0.0001$        |
|                               |  | $F_{\text{Beverage}}(1,16)=0.381; p=0.5456$    | $F_{\text{Beverage}}(1,16)=9.163; p=0.0080$     | $F_{\text{Beverage}}(1,16)=31.692; p<0.0001$    |
|                               |  | $F_{\text{Interaction}}(1,16)=4.221; p=0.0566$ | $F_{\text{Interaction}}(1,16)=8.847; p=0.0089$  | $F_{\text{Interaction}}(1,16)=42.444; p<0.0001$ |
| <b>HYPOTHALAMUS</b>           |  |                                                |                                                 |                                                 |
|                               |  | $F_{\text{Diet}}(1,16)=125.590; p<0.0001$      | $F_{\text{Diet}}(1,16)=50.174; p<0.0001$        | $F_{\text{Diet}}(1,16)=31.181; p<0.0001$        |
| <b>LXR<math>\alpha</math></b> |  | $F_{\text{Beverage}}(1,16)=0.861; p=0.3672$    | $F_{\text{Beverage}}(1,16)=3.857; p=0.0672$     | $F_{\text{Beverage}}(1,16)=15.962; p=0.0010$    |
|                               |  | $F_{\text{Interaction}}(1,16)=1.815; p=0.196$  | $F_{\text{Interaction}}(1,16)=6.478; p=0.0216$  | $F_{\text{Interaction}}(1,16)=23.530; p=0.0002$ |
| <b>LXR<math>\beta</math></b>  |  | $F_{\text{Diet}}(1,16)=104.798; p<0.0001$      | $F_{\text{Diet}}(1,16)=61.718; p<0.0001$        | $F_{\text{Diet}}(1,16)=40.049; p<0.0001$        |
|                               |  | $F_{\text{Beverage}}(1,16)=3.784; p=0.0695$    | $F_{\text{Beverage}}(1,16)=13.911; p=0.0018$    | $F_{\text{Beverage}}(1,16)=22.519; p=0.0002$    |
|                               |  | $F_{\text{Interaction}}(1,16)=0.425; p=0.5238$ | $F_{\text{Interaction}}(1,16)=12.236; p=0.0030$ | $F_{\text{Interaction}}(1,16)=28.156; p<0.0001$ |

**Table S5:**Composition of normal diet and high-fat diet.

|                     | Normal diet | High-fat diet |
|---------------------|-------------|---------------|
| Proteins            | 18.2%       | 15.3%         |
| Carbohydrates       | 56.9%       | 39.2%         |
| Lipids              | 3.9%        | 1.9%          |
| BovineFat           | 0           | 27.5%         |
| Fiber               | 5%          | 3.5%          |
| Cholesterol         | 0           | 1.4%          |
| Mineral &Vitaminmix | 3%          | 2.5%          |
| Humidity            | 13%         | 8.7%          |
| Energy kcal/kg diet | 3285        | 4824          |

Values are expressed as percent of diet.

| Minerals concentration (per kg) | Normal diet | High-fat diet |
|---------------------------------|-------------|---------------|
| Manganese (Mn)                  | 75 ppm      | 53.6 ppm      |
| Iron (Fe)                       | 50 ppm      | 35.7 ppm      |
| Copper (Cu)                     | 7.4 ppm     | 5.3 ppm       |
| Iodine (I)                      | 0.6 ppm     | 0.4 ppm       |
| Calcium (Ca)                    | 1.2 %       | 0.9 %         |
| Phosphorus (P)                  | 0.9 %       | 0.6 %         |
| Salt (NaCl)                     | 0.45 %      | 0.3 %         |
| Sodium (Na)                     | 0.2 %       | 0.1 %         |
| Zinc (Zn)                       | 55 ppm      | 39.3 ppm      |
| Seleniun (Se)                   | 0.21 ppm    | 0.2 ppm       |

| Vitamins concentration (per kg) | Normal diet | High-fat diet |
|---------------------------------|-------------|---------------|
| A                               | 6.05 UI     | 4.3 UI        |
| D3                              | 5.06 UI     | 3.6 UI        |
| E                               | 22 UI       | 15.7 UI       |
| C                               | 125 mg      | 89.3 mg       |
| Niacin                          | 32.34 mg    | 23.10 mg      |
| Pantothenicacid                 | 19.8 mg     | 14.1 mg       |
| Thiamine                        | 11 mg       | 7.9 mg        |
| Riboflavin                      | 3.74 mg     | 2.67 mg       |
| Menadione                       | 3.08 mg     | 2.20 mg       |
| Folicacid                       | 2.4 mg      | 1.7 mg        |
| Pyridoxine                      | 1.9 mg      | 1.4 mg        |
| Biotin                          | 0.15 mg     | 0.11 mg       |
| Cyanocobalamin                  | 0.005 mg    | 0.004 mg      |

| Amino acids concentration (per kg) | Normal diet | High-fat diet |
|------------------------------------|-------------|---------------|
|------------------------------------|-------------|---------------|

|                      |        |        |
|----------------------|--------|--------|
| Arginine             | 1.18 % | 0.84 % |
| Isoleucine           | 0.75 % | 0.54 % |
| Leucine              | 1.65 % | 1.18 % |
| Lysine               | 1.03 % | 0.74 % |
| Methionine - Cystine | 0.80 % | 0.57 % |
| Cystine              | 0.45 % | 0.32 % |
| Methionine           | 0.34 % | 0.24 % |
| Tryptophan           | 0.20 % | 0.14 % |
| Threonine            | 0.69 % | 0.49 % |

List of the components used in the elaboration of normal diet: Fish flour, meat flour, viscera flour, beef tallow, soybean flour, sunflower flour, corn, wheat, sorghum, barley, oats, roasted bean soybean, bran wheat, gluten flour, sodium chloride, shell, bentonite, calcium phosphate, ash bone, minerals (sodium selenite, calcium iodate, copper oxide, zinc oxide, manganese oxide, ferrous sulfate), vitamins (A, D3, E, C, menadione, thiamine, riboflavin, pyridoxine, pantothenic acid, biotin, niacin, folic acid, cyanocobalamin), liquid choline, amino acids (arginine, isoleucine, leucine, L-lysine, methionine-cystine, cysteine, DL-methionine, tryptophan, threonine), antioxidant (ethoxyquin).
